# Supplementary material for: Genetic Structure and Linkage Disequilibrium in a Diverse, Representative Collection of the C4 Model Plant, Sorghum bicolor
Source: PubMed Central journal article supplement (PMC3656726; doi:10.1534/g3.112.004861), 2013-05-01
Supplement: supp_3.5.783_004861SI.pdf [file supp_3.5.783_004861SI.pdf]

**Genetic structure and linkage disequilibrium in a diverse, representative collection of the C4 model plant, *Sorghum bicolor*.**

Yi-Hong Wang<sup>\*,‡</sup>, Hari D. Upadhyaya<sup>§,‡</sup>, A. Millie Burrell<sup>†</sup>, Sayed Mohammad Ebrahim Sahraeian<sup>‡</sup>, Robert R. Klein<sup>\*\*</sup>, Patricia E. Klein<sup>†,1</sup>

<sup>‡</sup> Contributed equally to this work.

<sup>\*</sup> Department of Biology, University of Louisiana at Lafayette, Lafayette, LA 70504, USA.

<sup>§</sup> Gene Bank, International Crops Research Institute for the Semi-Arid Tropics (ICRISAT), Patancheru 502 324, Andhra Pradesh, India.

<sup>†</sup> Department of Horticultural Sciences and Institute for Plant Genomics and Biotechnology, Texas A&M University, College Station, TX 77843, USA.

<sup>‡</sup> Department of Electrical and Computer Engineering, Texas A&M University, College Station, TX 77843, USA.

<sup>\*\*</sup> USDA-ARS, Southern Plains Agricultural Research Center, College Station, TX 77845, USA.

<sup>1</sup> Corresponding author:

Patricia E. Klein  
Department of Horticultural Sciences and Institute for Plant Genomics and Biotechnology  
Texas A&M University  
TAMU 2123  
College Station, TX 77843  
pklein@tamu.edu  
phone: 979-862-6308

**DOI: 10.1534/g3.112.004861**

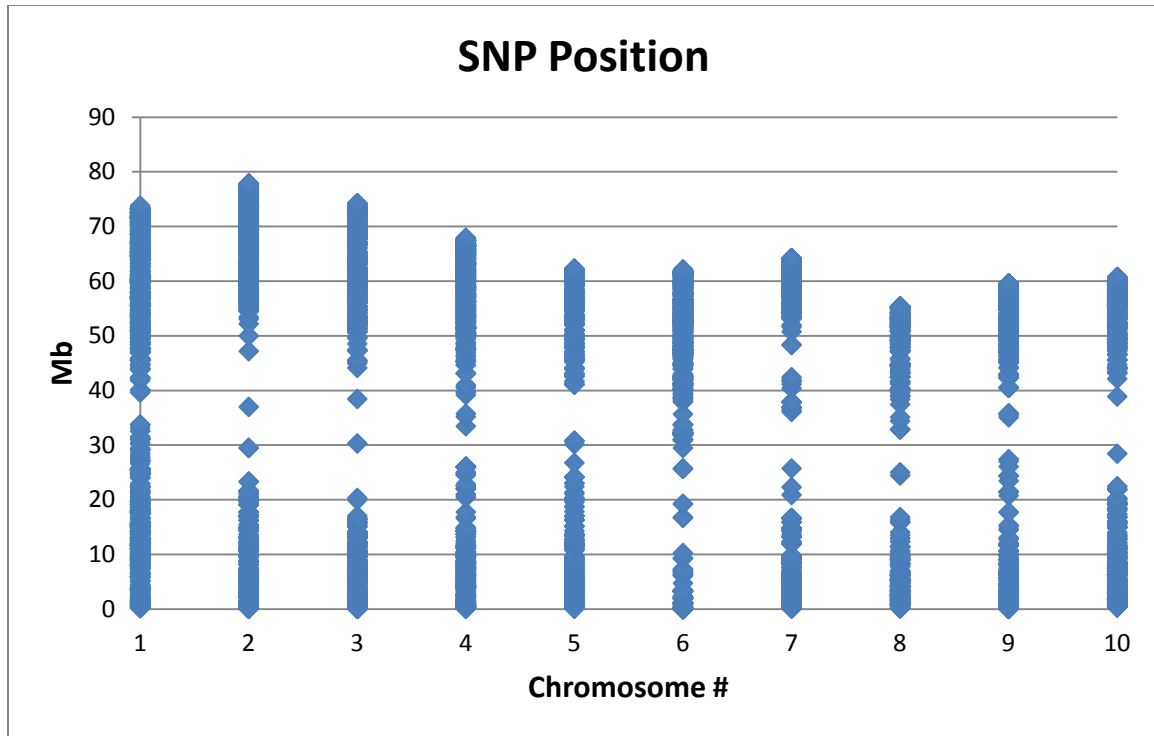

**Figure S1a** Distribution of SNPs utilized in this study across the 10 *Sorghum bicolor* chromosomes. The location of SNPs generated by genotyping-by-sequencing at *FseI* cut-sites are represented by blue squares. The y-axis represents the physical location of the SNPs across the sorghum genome. The SNPs are well-distributed over the 10 chromosomes and cover predominantly euchromatic regions of the genome. Regions in which SNPs are absent represent the gene-poor pericentromeric heterochromatic regions.

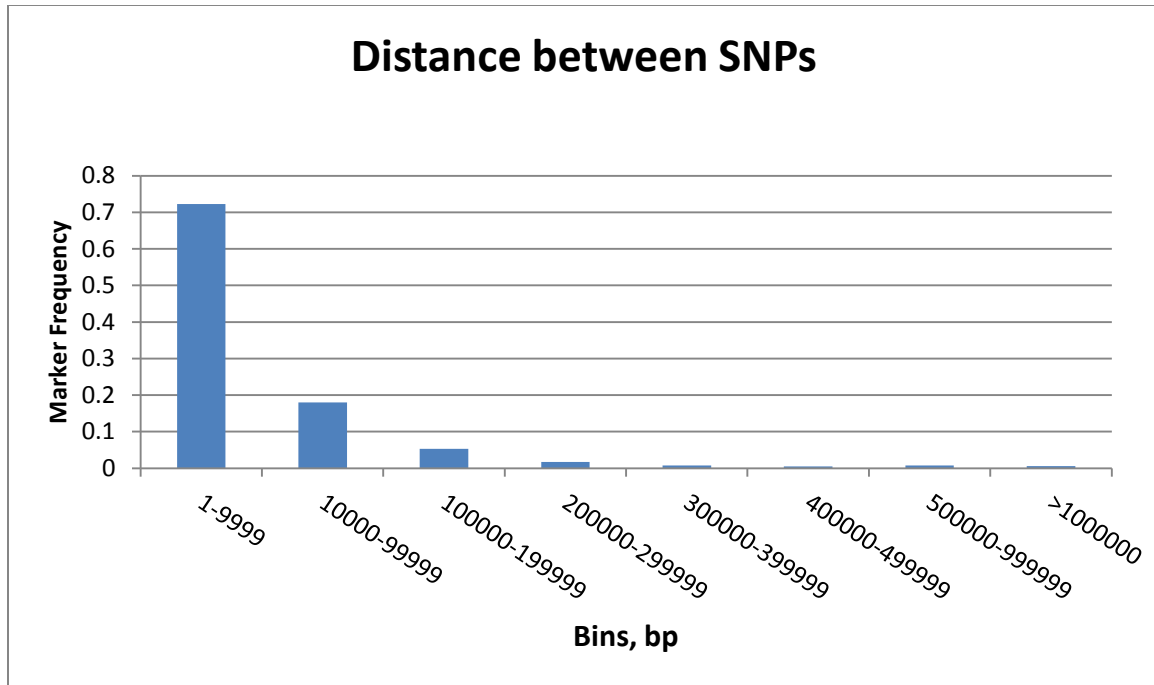

**Figure S1b** Distance between SNPs utilized in this study. The x-axis represents ranges of base pair distances between adjacent SNPs. The y-axis represents the percentage of total SNPs that fall within a specific range. The figure shows that 72% of the SNPs fall within 10,000 base pairs of each other.

Table S1 is available for download at <http://www.g3journal.org/lookup/suppl/doi:10.1534/g3.112.004861/-/DC1>.

**Table S1** Genotype data for 242 accession mini core collection and BTx623 reference genotype following genotyping-by-sequencing with *FseI*-digested DNA and imputation of missing data with fastPHASE. SNPs were detected using the CLC Genomics Workbench SNP detection tool following mapping of sequences from each line to the BTx623 reference genome.

**Table S2 Clustering of the sorghum mini core accessions by principal component analysis and STRUCTURE using 13,390 SNP markers.**

| PCA groups | Accession | Race | Country    | SGs | Accession | Race | Country     |
|------------|-----------|------|------------|-----|-----------|------|-------------|
| PG1        | IS602     | B    | USA        | SG1 | 23644     | G    | Gambia      |
|            | IS603     | B    | USA        |     | 25989     | G    | Mali        |
|            | IS608     | B    | USA        |     | 27697     | G    | SierraLeone |
|            | IS2426    | CB   | Afghan     |     | 25910     | G    | Mali        |
|            | IS2872    | CB   | Egypt      |     | 24503     | B    | S Africa    |
|            | IS14010   | CB   | S Africa   | SG2 | 10302     | C    | Thailand    |
|            | IS19262   | GC   | Sudan      |     | 19153     | GC   | Sudan       |
|            | IS20727   | B    | USA        |     | 23521     | GC   | Ethiopia    |
|            | IS21863   | B    | Syrian     |     | 23579     | GC   | Ethiopia    |
|            | IS22616   | B    | Myanmar    |     | 23586     | GC   | Ethiopia    |
|            | IS24462   | CB   | S Africa   |     | 23590     | GC   | Ethiopia    |
|            | IS26617   | CB   | Madagascar |     | 24348     | C    | India       |
|            | IS27786   | DB   | Morocco    |     | 23514     | C    | Ethiopia    |
|            | IS31681   | B    | Algeria    |     | 17941     | C    | India       |
| PG2        | IS1041    | D    | India      |     | 4092      | C    | India       |
|            | IS3971    | D    | India      |     | 2864      | C    | S Africa    |
|            | IS4060    | DB   | India      |     | 20713     | GC   | USA         |
|            | IS4360    | D    | India      |     | 12965     | C    | Cuba        |
|            | IS4372    | GD   | India      |     | 29914     | C    | Zimbabwe    |
|            | IS4515    | D    | India      |     | 20956     | DC   | Indonesia   |
|            | IS4581    | D    | India      |     | 2379      | C    | S Africa    |
|            | IS4613    | D    | India      |     | 21083     | C    | Kenya       |
|            | IS4631    | D    | India      |     | 15170     | C    | Cameroon    |
|            | IS4698    | D    | India      |     | 29950     | GC   | Zimbabwe    |
|            | IS5094    | D    | India      |     | 9177      | C    | Kenya       |
|            | IS5386    | D    | India      |     | 7305      | C    | Nigeria     |
|            | IS5667    | D    | India      |     | 14779     | C    | Cameroon    |
|            | IS5919    | D    | India      |     | 9745      | C    | Sudan       |
|            | IS6351    | D    | India      |     | 22986     | C    | Sudan       |
|            | IS6354    | D    | India      |     | 20632     | C    | USA         |
|            | IS6421    | D    | India      |     | 20697     | C    | USA         |
|            | IS8348    | D    | Pakistan   |     | 10757     | C    | Chad        |
|            | IS12883   | D    | India      |     | 11473     | C    | Ethiopia    |
|            | IS12937   | K    | Ethiopia   |     | 15466     | C    | Cameroon    |
|            | IS17980   | D    | India      |     | 20625     | DC   | USA         |
|            | IS18039   | DB   | India      |     | 14090     | C    | Argentina   |
|            | IS19859   | D    | India      | SG3 | 7250      | G    | Nigeria     |
|            | IS22799   | D    | Somalia    |     | 7310      | G    | Nigeria     |

|      |         |    |          |     |  |       |    |             |
|------|---------|----|----------|-----|--|-------|----|-------------|
|      | IS32787 | D  | Somalia  |     |  | 7679  | G  | Nigeria     |
| PG3  | IS1212  | KB | China    |     |  | 15931 | G  | Cameroon    |
|      | IS1219  | GB | China    |     |  | 16382 | G  | Cameroon    |
|      | IS20740 | B  | USA      |     |  | 26484 | G  | Benin       |
|      | IS29654 | KB | China    |     |  | 7957  | GB | Nigeria     |
|      | IS30383 | CB | China    |     |  | 7987  | G  | Nigeria     |
|      | IS30400 | CB | China    |     |  | 25089 | G  | Ghana       |
|      | IS30417 | CB | China    |     |  | 15478 | GC | Cameroon    |
|      | IS30443 | CB | China    |     |  | 15945 | GC | Cameroon    |
|      | IS30450 | CB | China    |     |  | 16528 | G  | Cameroon    |
|      | IS30451 | CB | China    |     |  | 30838 | G  | Cameroon    |
|      | IS30460 | C  | China    |     |  | 26046 | G  | Mali        |
|      | IS30466 | CB | China    |     |  | 26025 | G  | Mali        |
|      | IS30507 | CB | Korea    |     |  | 19975 | G  | Senegal     |
|      | IS30508 | CB | Korea    |     |  | 27557 | G  | BurkinaFaso |
|      | IS30533 | CB | Korea    |     |  | 2902  | CB | Nigeria     |
|      | IS30536 | CB | Korea    |     |  | 26222 | GC | Togo        |
|      | IS30562 | B  | Korea    |     |  | 10867 | GC | Chad        |
| PG4  | IS22720 | D  | Somalia  |     |  | 14861 | C  | Cameroon    |
|      | IS23891 | D  | Yemen    |     |  | 30572 | GC | Cameroon    |
|      | IS23992 | C  | Yemen    | SG4 |  | 11619 | DB | Ethiopia    |
|      | IS27034 | D  | Sudan    |     |  | 11919 | DB | Ethiopia    |
|      | IS28141 | DC | Yemen    |     |  | 13549 | CB | Mexico      |
|      | IS28389 | DC | Yemen    |     |  | 25249 | DB | Ethiopia    |
|      | IS28449 | GC | Yemen    |     |  | 25301 | DB | Ethiopia    |
|      | IS28451 | GC | Yemen    |     |  | 3121  | B  | USA         |
|      | IS28614 | DC | Yemen    | SG5 |  | 25548 | C  | Rwanda      |
|      | IS28747 | DC | Yemen    |     |  | 33353 | C  | Kenya       |
|      | IS29091 | DC | Yemen    |     |  | 22609 | C  | Sri Lanka   |
|      | IS29100 | DC | Yemen    |     |  | 31557 | C  | Burundi     |
|      | IS31706 | D  | Yemen    |     |  | 31446 | GC | Uganda      |
|      | IS31714 | DC | Yemen    |     |  | 9113  | C  | Kenya       |
|      | IS32245 | DC | Yemen    |     |  | 31186 | GC | Uganda      |
| PG 5 | IS1004  | D  | India    |     |  | 31651 | C  | Zaire       |
|      | IS3121  | B  | USA      |     |  | 8916  | GC | Uganda      |
|      | IS7131  | DC | Uganda   |     |  | 9108  | C  | Kenya       |
|      | IS8012  | B  | Japan    |     |  | 24939 | B  | Zambia      |
|      | IS10969 | GC | USA      |     |  | 31043 | C  | Uganda      |
|      | IS11026 | D  | Ethiopia | SG6 |  | 1212  | KB | China       |
|      | IS11619 | DB | Ethiopia |     |  | 29654 | KB | China       |
|      | IS11919 | DB | Ethiopia |     |  | 30383 | CB | China       |

|     |         |    |             |     |  |       |    |            |
|-----|---------|----|-------------|-----|--|-------|----|------------|
|     | IS12706 | CB | USA         |     |  | 30400 | CB | China      |
|     | IS12804 | B  | Turkey      |     |  | 30417 | CB | China      |
|     | IS13549 | CB | Mexico      |     |  | 30443 | CB | China      |
|     | IS15744 | DC | Cameroon    |     |  | 30450 | CB | China      |
|     | IS16151 | CB | Cameroon    |     |  | 30451 | CB | China      |
|     | IS20195 | B  | Niger       |     |  | 30460 | C  | China      |
|     | IS20679 | GC | USA         |     |  | 30466 | CB | China      |
|     | IS20743 | B  | USA         |     |  | 30507 | CB | Korea      |
|     | IS25249 | DB | Ethiopia    |     |  | 30508 | CB | Korea      |
|     | IS25301 | DB | Ethiopia    |     |  | 30533 | CB | Korea      |
|     | IS25732 | D  | Mali        |     |  | 30536 | CB | Korea      |
|     | IS25836 | D  | Mali        |     |  | 30562 | B  | Korea      |
|     | IS28313 | DC | Yemen       |     |  | 1219  | GB | China      |
|     | IS28849 | DC | Yemen       |     |  | 1233  | B  | China      |
| PG6 | IS2902  | CB | Nigeria     |     |  | 20740 | B  | USA        |
|     | IS7250  | G  | Nigeria     |     |  | 16151 | CB | Cameroon   |
|     | IS7310  | G  | Nigeria     |     |  | 603   | B  | USA        |
|     | IS7679  | G  | Nigeria     |     |  | 20727 | B  | USA        |
|     | IS7957  | GB | Nigeria     |     |  | 8012  | B  | Japan      |
|     | IS7987  | G  | Nigeria     |     |  | 20816 | B  | USA        |
|     | IS10867 | GC | Chad        |     |  | 602   | B  | USA        |
|     | IS15478 | GC | Cameroon    |     |  | 2426  | CB | Afghan     |
|     | IS15931 | G  | Cameroon    |     |  | 20743 | B  | USA        |
|     | IS15945 | GC | Cameroon    | SG7 |  | 23684 | G  | Mozambique |
|     | IS16382 | G  | Cameroon    |     |  | 24218 | G  | Tanzania   |
|     | IS16528 | G  | Cameroon    |     |  | 24175 | G  | Tanzania   |
|     | IS19975 | G  | Senegal     |     |  | 21645 | G  | Malawi     |
|     | IS20956 | DC | Indonesia   |     |  | 5295  | G  | India      |
|     | IS25089 | G  | Ghana       |     |  | 5301  | GC | India      |
|     | IS25910 | G  | Mali        |     |  | 32349 | G  | India      |
|     | IS26025 | G  | Mali        |     |  | 4951  | G  | India      |
|     | IS26046 | G  | Mali        |     |  | 24139 | G  | Tanzania   |
|     | IS26222 | GC | Togo        |     |  | 473   | GK | USA        |
|     | IS26484 | G  | Benin       |     |  | 32439 | G  | India      |
|     | IS27557 | G  | BurkinaFaso |     |  | 29772 | GC | Zimbabwe   |
|     | IS30838 | G  | Cameroon    |     |  | 21512 | G  | Malawi     |
| PG7 | IS2379  | C  | S Africa    |     |  | 33023 | G  | Tanzania   |
|     | IS2864  | C  | S Africa    |     |  | 24953 | GC | Zambia     |
|     | IS4092  | C  | India       |     |  | 23216 | CB | Zambia     |
|     | IS7305  | C  | Nigeria     |     |  | 2382  | C  | S Africa   |
|     | IS9108  | C  | Kenya       |     |  | 30079 | DC | Zimbabwe   |

|      |         |    |              |     |  |       |    |            |
|------|---------|----|--------------|-----|--|-------|----|------------|
|      | IS9177  | C  | Kenya        |     |  | 13294 | CB | Venezuela  |
|      | IS9745  | C  | Sudan        |     |  | 29714 | KD | Zimbabwe   |
|      | IS10302 | C  | Thailand     |     |  | 8777  | CB | Uganda     |
|      | IS10757 | C  | Chad         |     |  | 26617 | CB | Madagascar |
|      | IS11473 | C  | Ethiopia     |     |  | 33090 | D  | Honduras   |
|      | IS12965 | C  | Cuba         | SG8 |  | 2389  | K  | S Africa   |
|      | IS14779 | C  | Cameroon     |     |  | 2397  | K  | S Africa   |
|      | IS14861 | C  | Cameroon     |     |  | 8774  | KD | S Africa   |
|      | IS15170 | C  | Cameroon     |     |  | 12735 | CB | Saudi      |
|      | IS15466 | C  | Cameroon     |     |  | 13782 | KD | S Africa   |
|      | IS17941 | C  | India        |     |  | 13919 | KC | S Africa   |
|      | IS19153 | GC | Sudan        |     |  | 13971 | C  | S Africa   |
|      | IS20298 | CB | Niger        |     |  | 19450 | GK | Botswana   |
|      | IS20625 | DC | USA          |     |  | 24463 | K  | S Africa   |
|      | IS20632 | C  | USA          |     |  | 24492 | K  | S Africa   |
|      | IS20713 | GC | USA          |     |  | 26737 | K  | S Africa   |
|      | IS21083 | C  | Kenya        |     |  | 26749 | K  | S Africa   |
|      | IS22986 | C  | Sudan        |     |  | 29233 | K  | Swaziland  |
|      | IS23514 | C  | Ethiopia     |     |  | 29239 | K  | Swaziland  |
|      | IS23521 | GC | Ethiopia     |     |  | 29241 | KC | Swaziland  |
|      | IS23579 | GC | Ethiopia     |     |  | 29304 | GK | Swaziland  |
|      | IS23586 | GC | Ethiopia     |     |  | 29519 | KC | Lesotho    |
|      | IS23590 | GC | Ethiopia     |     |  | 29314 | DC | Swaziland  |
|      | IS23644 | G  | Gambia       |     |  | 29565 | GC | Lesotho    |
|      | IS24348 | C  | India        |     |  | 29582 | K  | Lesotho    |
|      | IS25989 | G  | Mali         |     |  | 19445 | K  | Botswana   |
|      | IS27697 | G  | Sierra Leone |     |  | 29392 | K  | Lesotho    |
|      | IS29914 | C  | Zimbabwe     |     |  | 13893 | KC | S Africa   |
|      | IS29950 | GC | Zimbabwe     |     |  | 29441 | KC | Lesotho    |
|      | IS31043 | C  | Uganda       |     |  | 29269 | GC | Swaziland  |
|      | IS8916  | GC | Uganda       |     |  | 26694 | C  | S Africa   |
| PG 8 | IS9113  | C  | Kenya        |     |  | 29187 | GC | Swaziland  |
|      | IS13294 | CB | Venezuela    |     |  | 29335 | C  | Swaziland  |
|      | IS22609 | C  | Sri Lanka    |     |  | 19676 | K  | Zimbabwe   |
|      | IS25548 | C  | Rwanda       |     |  | 29568 | KC | Lesotho    |
|      | IS29733 | GD | Zimbabwe     |     |  | 27912 | KC | S Africa   |
|      | IS30079 | DC | Zimbabwe     |     |  | 29468 | GC | Lesotho    |
|      | IS31186 | GC | Uganda       |     |  | 29627 | DC | S Africa   |
|      | IS31446 | GC | Uganda       |     |  | 22239 | K  | Botswana   |
|      | IS31557 | C  | Burundi      |     |  | 29358 | K  | Lesotho    |
|      | IS31651 | C  | Zaire        |     |  | 12302 | C  | Zimbabwe   |



|       |         |    |            |      |  |       |    |            |
|-------|---------|----|------------|------|--|-------|----|------------|
|       | IS33353 | C  | Kenya      |      |  | 12945 | K  | Nicaragua  |
|       | IS4951  | G  | India      |      |  | 30092 | DC | Zimbabwe   |
| PG 9  | IS5295  | G  | India      |      |  | 29606 | K  | S Africa   |
|       | IS5301  | GC | India      |      |  | 29689 | K  | Zimbabwe   |
|       | IS32349 | G  | India      |      |  | 22294 | K  | Botswana   |
|       | IS32439 | G  | India      |      |  | 3158  | K  | S Africa   |
|       | IS33090 | D  | Honduras   |      |  | 29326 | CB | Swaziland  |
|       | IS473   | GK | USA        |      |  | 30231 | K  | Zimbabwe   |
| PG 10 | IS21512 | G  | Malawi     |      |  | 26701 | CB | S Africa   |
|       | IS21645 | G  | Malawi     |      |  | 19389 | C  | Bangladesh |
|       | IS23216 | CB | Zambia     |      |  | 995   | CB | USA        |
|       | IS23684 | G  | Mozambique |      |  | 608   | B  | USA        |
|       | IS24139 | G  | Tanzania   |      |  | 19262 | GC | Sudan      |
|       | IS24175 | G  | Tanzania   |      |  | 24462 | CB | S Africa   |
|       | IS24218 | G  | Tanzania   |      |  | 14010 | CB | S Africa   |
|       | IS24939 | B  | Zambia     |      |  | 14290 | KD | Botswana   |
|       | IS29772 | GC | Zimbabwe   |      |  | 24453 | CB | S Africa   |
|       | IS33023 | G  | Tanzania   |      |  | 29733 | GD | Zimbabwe   |
|       | IS2389  | K  | S Africa   |      |  | 27887 | CB | S Africa   |
| PG 11 | IS2397  | K  | S Africa   |      |  | 22616 | B  | Myanmar    |
|       | IS8774  | KD | S Africa   |      |  | 12447 | DC | Sudan      |
|       | IS12302 | C  | Zimbabwe   |      |  | 12697 | B  | Australia  |
|       | IS12735 | CB | Saudi      | SG9  |  | 25732 | D  | Mali       |
|       | IS12945 | K  | Nicaragua  |      |  | 10969 | GC | USA        |
|       | IS13782 | KD | S Africa   |      |  | 7131  | DC | Uganda     |
|       | IS13893 | KC | S Africa   |      |  | 11026 | D  | Ethiopia   |
|       | IS13919 | KC | S Africa   |      |  | 1004  | D  | India      |
|       | IS13971 | C  | S Africa   |      |  | 20679 | GC | USA        |
|       | IS14290 | KD | Botswana   |      |  | 25836 | D  | Mali       |
|       | IS19389 | C  | Bangladesh |      |  | 12706 | CB | USA        |
|       | IS19445 | K  | Botswana   |      |  | 15744 | DC | Cameroon   |
|       | IS19450 | GK | Botswana   |      |  | 28849 | DC | Yemen      |
|       | IS19676 | K  | Zimbabwe   |      |  | 20195 | B  | Niger      |
|       | IS22239 | K  | Botswana   |      |  | 2872  | CB | Egypt      |
|       | IS22294 | K  | Botswana   |      |  | 22799 | D  | Somalia    |
|       | IS24453 | CB | S Africa   |      |  | 22720 | D  | Somalia    |
|       | IS24463 | K  | S Africa   |      |  | 20298 | CB | Niger      |
|       | IS24492 | K  | S Africa   |      |  | 12804 | B  | Turkey     |
|       | IS26694 | C  | S Africa   |      |  | 2413  | B  | Iran       |
|       | IS26701 | CB | S Africa   | SG10 |  | 28449 | GC | Yemen      |
|       | IS26737 | K  | S Africa   |      |  | 28451 | GC | Yemen      |

|             |         |    |           |      |  |       |    |          |
|-------------|---------|----|-----------|------|--|-------|----|----------|
|             | IS26749 | K  | S Africa  |      |  | 28614 | DC | Yemen    |
|             | IS27887 | CB | S Africa  |      |  | 28747 | DC | Yemen    |
|             | IS27912 | KC | S Africa  |      |  | 29091 | DC | Yemen    |
|             | IS29187 | GC | Swaziland |      |  | 29100 | DC | Yemen    |
|             | IS29233 | K  | Swaziland |      |  | 28389 | DC | Yemen    |
|             | IS29239 | K  | Swaziland |      |  | 28141 | DC | Yemen    |
|             | IS29241 | KC | Swaziland |      |  | 23891 | D  | Yemen    |
|             | IS29269 | GC | Swaziland |      |  | 31706 | D  | Yemen    |
|             | IS29304 | GK | Swaziland |      |  | 31714 | DC | Yemen    |
|             | IS29314 | DC | Swaziland |      |  | 23992 | C  | Yemen    |
|             | IS29326 | CB | Swaziland |      |  | 32245 | DC | Yemen    |
|             | IS29335 | C  | Swaziland |      |  | 27034 | D  | Sudan    |
|             | IS29358 | K  | Lesotho   |      |  | 28313 | DC | Yemen    |
|             | IS29392 | K  | Lesotho   |      |  | 27786 | DB | Morocco  |
|             | IS29441 | KC | Lesotho   |      |  | 31681 | B  | Algeria  |
|             | IS29468 | GC | Lesotho   |      |  | 21863 | B  | Syrian   |
|             | IS29519 | KC | Lesotho   | SG11 |  | 1041  | D  | India    |
|             | IS29565 | GC | Lesotho   |      |  | 4515  | D  | India    |
|             | IS29568 | KC | Lesotho   |      |  | 4581  | D  | India    |
|             | IS29582 | K  | Lesotho   |      |  | 4698  | D  | India    |
|             | IS29606 | K  | S Africa  |      |  | 6351  | D  | India    |
|             | IS29627 | DC | S Africa  |      |  | 6354  | D  | India    |
|             | IS29689 | K  | Zimbabwe  |      |  | 6421  | D  | India    |
|             | IS30092 | DC | Zimbabwe  |      |  | 5094  | D  | India    |
|             | IS30231 | K  | Zimbabwe  |      |  | 32787 | D  | Somalia  |
|             | IS995   | CB | USA       |      |  | 4631  | D  | India    |
| Unclustered | IS1233  | B  | China     |      |  | 18039 | DB | India    |
|             | IS2382  | C  | S Africa  |      |  | 12937 | K  | Ethiopia |
|             | IS2413  | B  | Iran      |      |  | 17980 | D  | India    |
|             | IS3158  | K  | S Africa  |      |  | 4613  | D  | India    |
|             | IS8777  | CB | Uganda    |      |  | 5386  | D  | India    |
|             | IS12447 | DC | Sudan     |      |  | 4372  | GD | India    |
|             | IS12697 | B  | Australia |      |  | 5667  | D  | India    |
|             | IS14090 | C  | Argentina |      |  | 19859 | D  | India    |
|             | IS20697 | C  | USA       |      |  | 4360  | D  | India    |
|             | IS20816 | B  | USA       |      |  | 4060  | DB | India    |
|             | IS24503 | B  | S Africa  |      |  | 5919  | D  | India    |
|             | IS24953 | GC | Zambia    |      |  | 3971  | D  | India    |
|             | IS29714 | KD | Zimbabwe  |      |  | 8348  | D  | Pakistan |
|             | IS30572 | GC | Cameroon  |      |  | 12883 | D  | India    |

Notes: B-bicolor; C-caudatum; D-durra; G-guinea, K-kafir, and KD, KC, CB, etc. are hybrid races.
