# Supplementary material for: Genetic Structure and Linkage Disequilibrium in a Diverse, Representative Collection of the C4 Model Plant, Sorghum bicolor
Source: PubMed Central journal article supplement (PMC3656726; doi:10.1534/g3.112.004861), 2013-05-01
Supplement: supp_3.5.783_TableS2.pdf [file supp_3.5.783_TableS2.pdf]

**Table S2 Clustering of the sorghum mini core accessions by principal component analysis and STRUCTURE using 13,390 SNP markers.**

| PCA groups | Accession | Race | Country    | SGs | Accession | Race | Country     |
|------------|-----------|------|------------|-----|-----------|------|-------------|
| PG1        | IS602     | B    | USA        | SG1 | 23644     | G    | Gambia      |
|            | IS603     | B    | USA        |     | 25989     | G    | Mali        |
|            | IS608     | B    | USA        |     | 27697     | G    | SierraLeone |
|            | IS2426    | CB   | Afghan     |     | 25910     | G    | Mali        |
|            | IS2872    | CB   | Egypt      |     | 24503     | B    | S Africa    |
|            | IS14010   | CB   | S Africa   | SG2 | 10302     | C    | Thailand    |
|            | IS19262   | GC   | Sudan      |     | 19153     | GC   | Sudan       |
|            | IS20727   | B    | USA        |     | 23521     | GC   | Ethiopia    |
|            | IS21863   | B    | Syrian     |     | 23579     | GC   | Ethiopia    |
|            | IS22616   | B    | Myanmar    |     | 23586     | GC   | Ethiopia    |
|            | IS24462   | CB   | S Africa   |     | 23590     | GC   | Ethiopia    |
|            | IS26617   | CB   | Madagascar |     | 24348     | C    | India       |
|            | IS27786   | DB   | Morocco    |     | 23514     | C    | Ethiopia    |
|            | IS31681   | B    | Algeria    |     | 17941     | C    | India       |
| PG2        | IS1041    | D    | India      |     | 4092      | C    | India       |
|            | IS3971    | D    | India      |     | 2864      | C    | S Africa    |
|            | IS4060    | DB   | India      |     | 20713     | GC   | USA         |
|            | IS4360    | D    | India      |     | 12965     | C    | Cuba        |
|            | IS4372    | GD   | India      |     | 29914     | C    | Zimbabwe    |
|            | IS4515    | D    | India      |     | 20956     | DC   | Indonesia   |
|            | IS4581    | D    | India      |     | 2379      | C    | S Africa    |
|            | IS4613    | D    | India      |     | 21083     | C    | Kenya       |
|            | IS4631    | D    | India      |     | 15170     | C    | Cameroon    |
|            | IS4698    | D    | India      |     | 29950     | GC   | Zimbabwe    |
|            | IS5094    | D    | India      |     | 9177      | C    | Kenya       |
|            | IS5386    | D    | India      |     | 7305      | C    | Nigeria     |
|            | IS5667    | D    | India      |     | 14779     | C    | Cameroon    |
|            | IS5919    | D    | India      |     | 9745      | C    | Sudan       |
|            | IS6351    | D    | India      |     | 22986     | C    | Sudan       |
|            | IS6354    | D    | India      |     | 20632     | C    | USA         |
|            | IS6421    | D    | India      |     | 20697     | C    | USA         |
|            | IS8348    | D    | Pakistan   |     | 10757     | C    | Chad        |
|            | IS12883   | D    | India      |     | 11473     | C    | Ethiopia    |
|            | IS12937   | K    | Ethiopia   |     | 15466     | C    | Cameroon    |
|            | IS17980   | D    | India      |     | 20625     | DC   | USA         |
|            | IS18039   | DB   | India      |     | 14090     | C    | Argentina   |
|            | IS19859   | D    | India      | SG3 | 7250      | G    | Nigeria     |
|            | IS22799   | D    | Somalia    |     | 7310      | G    | Nigeria     |

|      |         |    |          |     |  |       |    |             |
|------|---------|----|----------|-----|--|-------|----|-------------|
|      | IS32787 | D  | Somalia  |     |  | 7679  | G  | Nigeria     |
| PG3  | IS1212  | KB | China    |     |  | 15931 | G  | Cameroon    |
|      | IS1219  | GB | China    |     |  | 16382 | G  | Cameroon    |
|      | IS20740 | B  | USA      |     |  | 26484 | G  | Benin       |
|      | IS29654 | KB | China    |     |  | 7957  | GB | Nigeria     |
|      | IS30383 | CB | China    |     |  | 7987  | G  | Nigeria     |
|      | IS30400 | CB | China    |     |  | 25089 | G  | Ghana       |
|      | IS30417 | CB | China    |     |  | 15478 | GC | Cameroon    |
|      | IS30443 | CB | China    |     |  | 15945 | GC | Cameroon    |
|      | IS30450 | CB | China    |     |  | 16528 | G  | Cameroon    |
|      | IS30451 | CB | China    |     |  | 30838 | G  | Cameroon    |
|      | IS30460 | C  | China    |     |  | 26046 | G  | Mali        |
|      | IS30466 | CB | China    |     |  | 26025 | G  | Mali        |
|      | IS30507 | CB | Korea    |     |  | 19975 | G  | Senegal     |
|      | IS30508 | CB | Korea    |     |  | 27557 | G  | BurkinaFaso |
|      | IS30533 | CB | Korea    |     |  | 2902  | CB | Nigeria     |
|      | IS30536 | CB | Korea    |     |  | 26222 | GC | Togo        |
|      | IS30562 | B  | Korea    |     |  | 10867 | GC | Chad        |
| PG4  | IS22720 | D  | Somalia  |     |  | 14861 | C  | Cameroon    |
|      | IS23891 | D  | Yemen    |     |  | 30572 | GC | Cameroon    |
|      | IS23992 | C  | Yemen    | SG4 |  | 11619 | DB | Ethiopia    |
|      | IS27034 | D  | Sudan    |     |  | 11919 | DB | Ethiopia    |
|      | IS28141 | DC | Yemen    |     |  | 13549 | CB | Mexico      |
|      | IS28389 | DC | Yemen    |     |  | 25249 | DB | Ethiopia    |
|      | IS28449 | GC | Yemen    |     |  | 25301 | DB | Ethiopia    |
|      | IS28451 | GC | Yemen    |     |  | 3121  | B  | USA         |
|      | IS28614 | DC | Yemen    | SG5 |  | 25548 | C  | Rwanda      |
|      | IS28747 | DC | Yemen    |     |  | 33353 | C  | Kenya       |
|      | IS29091 | DC | Yemen    |     |  | 22609 | C  | Sri Lanka   |
|      | IS29100 | DC | Yemen    |     |  | 31557 | C  | Burundi     |
|      | IS31706 | D  | Yemen    |     |  | 31446 | GC | Uganda      |
|      | IS31714 | DC | Yemen    |     |  | 9113  | C  | Kenya       |
|      | IS32245 | DC | Yemen    |     |  | 31186 | GC | Uganda      |
| PG 5 | IS1004  | D  | India    |     |  | 31651 | C  | Zaire       |
|      | IS3121  | B  | USA      |     |  | 8916  | GC | Uganda      |
|      | IS7131  | DC | Uganda   |     |  | 9108  | C  | Kenya       |
|      | IS8012  | B  | Japan    |     |  | 24939 | B  | Zambia      |
|      | IS10969 | GC | USA      |     |  | 31043 | C  | Uganda      |
|      | IS11026 | D  | Ethiopia | SG6 |  | 1212  | KB | China       |
|      | IS11619 | DB | Ethiopia |     |  | 29654 | KB | China       |
|      | IS11919 | DB | Ethiopia |     |  | 30383 | CB | China       |

|     |         |    |             |     |  |       |    |            |
|-----|---------|----|-------------|-----|--|-------|----|------------|
|     | IS12706 | CB | USA         |     |  | 30400 | CB | China      |
|     | IS12804 | B  | Turkey      |     |  | 30417 | CB | China      |
|     | IS13549 | CB | Mexico      |     |  | 30443 | CB | China      |
|     | IS15744 | DC | Cameroon    |     |  | 30450 | CB | China      |
|     | IS16151 | CB | Cameroon    |     |  | 30451 | CB | China      |
|     | IS20195 | B  | Niger       |     |  | 30460 | C  | China      |
|     | IS20679 | GC | USA         |     |  | 30466 | CB | China      |
|     | IS20743 | B  | USA         |     |  | 30507 | CB | Korea      |
|     | IS25249 | DB | Ethiopia    |     |  | 30508 | CB | Korea      |
|     | IS25301 | DB | Ethiopia    |     |  | 30533 | CB | Korea      |
|     | IS25732 | D  | Mali        |     |  | 30536 | CB | Korea      |
|     | IS25836 | D  | Mali        |     |  | 30562 | B  | Korea      |
|     | IS28313 | DC | Yemen       |     |  | 1219  | GB | China      |
|     | IS28849 | DC | Yemen       |     |  | 1233  | B  | China      |
| PG6 | IS2902  | CB | Nigeria     |     |  | 20740 | B  | USA        |
|     | IS7250  | G  | Nigeria     |     |  | 16151 | CB | Cameroon   |
|     | IS7310  | G  | Nigeria     |     |  | 603   | B  | USA        |
|     | IS7679  | G  | Nigeria     |     |  | 20727 | B  | USA        |
|     | IS7957  | GB | Nigeria     |     |  | 8012  | B  | Japan      |
|     | IS7987  | G  | Nigeria     |     |  | 20816 | B  | USA        |
|     | IS10867 | GC | Chad        |     |  | 602   | B  | USA        |
|     | IS15478 | GC | Cameroon    |     |  | 2426  | CB | Afghan     |
|     | IS15931 | G  | Cameroon    |     |  | 20743 | B  | USA        |
|     | IS15945 | GC | Cameroon    | SG7 |  | 23684 | G  | Mozambique |
|     | IS16382 | G  | Cameroon    |     |  | 24218 | G  | Tanzania   |
|     | IS16528 | G  | Cameroon    |     |  | 24175 | G  | Tanzania   |
|     | IS19975 | G  | Senegal     |     |  | 21645 | G  | Malawi     |
|     | IS20956 | DC | Indonesia   |     |  | 5295  | G  | India      |
|     | IS25089 | G  | Ghana       |     |  | 5301  | GC | India      |
|     | IS25910 | G  | Mali        |     |  | 32349 | G  | India      |
|     | IS26025 | G  | Mali        |     |  | 4951  | G  | India      |
|     | IS26046 | G  | Mali        |     |  | 24139 | G  | Tanzania   |
|     | IS26222 | GC | Togo        |     |  | 473   | GK | USA        |
|     | IS26484 | G  | Benin       |     |  | 32439 | G  | India      |
|     | IS27557 | G  | BurkinaFaso |     |  | 29772 | GC | Zimbabwe   |
|     | IS30838 | G  | Cameroon    |     |  | 21512 | G  | Malawi     |
| PG7 | IS2379  | C  | S Africa    |     |  | 33023 | G  | Tanzania   |
|     | IS2864  | C  | S Africa    |     |  | 24953 | GC | Zambia     |
|     | IS4092  | C  | India       |     |  | 23216 | CB | Zambia     |
|     | IS7305  | C  | Nigeria     |     |  | 2382  | C  | S Africa   |
|     | IS9108  | C  | Kenya       |     |  | 30079 | DC | Zimbabwe   |

|      |         |    |              |     |  |       |    |            |
|------|---------|----|--------------|-----|--|-------|----|------------|
|      | IS9177  | C  | Kenya        |     |  | 13294 | CB | Venezuela  |
|      | IS9745  | C  | Sudan        |     |  | 29714 | KD | Zimbabwe   |
|      | IS10302 | C  | Thailand     |     |  | 8777  | CB | Uganda     |
|      | IS10757 | C  | Chad         |     |  | 26617 | CB | Madagascar |
|      | IS11473 | C  | Ethiopia     |     |  | 33090 | D  | Honduras   |
|      | IS12965 | C  | Cuba         | SG8 |  | 2389  | K  | S Africa   |
|      | IS14779 | C  | Cameroon     |     |  | 2397  | K  | S Africa   |
|      | IS14861 | C  | Cameroon     |     |  | 8774  | KD | S Africa   |
|      | IS15170 | C  | Cameroon     |     |  | 12735 | CB | Saudi      |
|      | IS15466 | C  | Cameroon     |     |  | 13782 | KD | S Africa   |
|      | IS17941 | C  | India        |     |  | 13919 | KC | S Africa   |
|      | IS19153 | GC | Sudan        |     |  | 13971 | C  | S Africa   |
|      | IS20298 | CB | Niger        |     |  | 19450 | GK | Botswana   |
|      | IS20625 | DC | USA          |     |  | 24463 | K  | S Africa   |
|      | IS20632 | C  | USA          |     |  | 24492 | K  | S Africa   |
|      | IS20713 | GC | USA          |     |  | 26737 | K  | S Africa   |
|      | IS21083 | C  | Kenya        |     |  | 26749 | K  | S Africa   |
|      | IS22986 | C  | Sudan        |     |  | 29233 | K  | Swaziland  |
|      | IS23514 | C  | Ethiopia     |     |  | 29239 | K  | Swaziland  |
|      | IS23521 | GC | Ethiopia     |     |  | 29241 | KC | Swaziland  |
|      | IS23579 | GC | Ethiopia     |     |  | 29304 | GK | Swaziland  |
|      | IS23586 | GC | Ethiopia     |     |  | 29519 | KC | Lesotho    |
|      | IS23590 | GC | Ethiopia     |     |  | 29314 | DC | Swaziland  |
|      | IS23644 | G  | Gambia       |     |  | 29565 | GC | Lesotho    |
|      | IS24348 | C  | India        |     |  | 29582 | K  | Lesotho    |
|      | IS25989 | G  | Mali         |     |  | 19445 | K  | Botswana   |
|      | IS27697 | G  | Sierra Leone |     |  | 29392 | K  | Lesotho    |
|      | IS29914 | C  | Zimbabwe     |     |  | 13893 | KC | S Africa   |
|      | IS29950 | GC | Zimbabwe     |     |  | 29441 | KC | Lesotho    |
|      | IS31043 | C  | Uganda       |     |  | 29269 | GC | Swaziland  |
|      | IS8916  | GC | Uganda       |     |  | 26694 | C  | S Africa   |
| PG 8 | IS9113  | C  | Kenya        |     |  | 29187 | GC | Swaziland  |
|      | IS13294 | CB | Venezuela    |     |  | 29335 | C  | Swaziland  |
|      | IS22609 | C  | Sri Lanka    |     |  | 19676 | K  | Zimbabwe   |
|      | IS25548 | C  | Rwanda       |     |  | 29568 | KC | Lesotho    |
|      | IS29733 | GD | Zimbabwe     |     |  | 27912 | KC | S Africa   |
|      | IS30079 | DC | Zimbabwe     |     |  | 29468 | GC | Lesotho    |
|      | IS31186 | GC | Uganda       |     |  | 29627 | DC | S Africa   |
|      | IS31446 | GC | Uganda       |     |  | 22239 | K  | Botswana   |
|      | IS31557 | C  | Burundi      |     |  | 29358 | K  | Lesotho    |
|      | IS31651 | C  | Zaire        |     |  | 12302 | C  | Zimbabwe   |

|       |         |    |            |      |  |       |    |            |
|-------|---------|----|------------|------|--|-------|----|------------|
|       | IS33353 | C  | Kenya      |      |  | 12945 | K  | Nicaragua  |
|       | IS4951  | G  | India      |      |  | 30092 | DC | Zimbabwe   |
| PG 9  | IS5295  | G  | India      |      |  | 29606 | K  | S Africa   |
|       | IS5301  | GC | India      |      |  | 29689 | K  | Zimbabwe   |
|       | IS32349 | G  | India      |      |  | 22294 | K  | Botswana   |
|       | IS32439 | G  | India      |      |  | 3158  | K  | S Africa   |
|       | IS33090 | D  | Honduras   |      |  | 29326 | CB | Swaziland  |
|       | IS473   | GK | USA        |      |  | 30231 | K  | Zimbabwe   |
| PG 10 | IS21512 | G  | Malawi     |      |  | 26701 | CB | S Africa   |
|       | IS21645 | G  | Malawi     |      |  | 19389 | C  | Bangladesh |
|       | IS23216 | CB | Zambia     |      |  | 995   | CB | USA        |
|       | IS23684 | G  | Mozambique |      |  | 608   | B  | USA        |
|       | IS24139 | G  | Tanzania   |      |  | 19262 | GC | Sudan      |
|       | IS24175 | G  | Tanzania   |      |  | 24462 | CB | S Africa   |
|       | IS24218 | G  | Tanzania   |      |  | 14010 | CB | S Africa   |
|       | IS24939 | B  | Zambia     |      |  | 14290 | KD | Botswana   |
|       | IS29772 | GC | Zimbabwe   |      |  | 24453 | CB | S Africa   |
|       | IS33023 | G  | Tanzania   |      |  | 29733 | GD | Zimbabwe   |
|       | IS2389  | K  | S Africa   |      |  | 27887 | CB | S Africa   |
| PG 11 | IS2397  | K  | S Africa   |      |  | 22616 | B  | Myanmar    |
|       | IS8774  | KD | S Africa   |      |  | 12447 | DC | Sudan      |
|       | IS12302 | C  | Zimbabwe   |      |  | 12697 | B  | Australia  |
|       | IS12735 | CB | Saudi      | SG9  |  | 25732 | D  | Mali       |
|       | IS12945 | K  | Nicaragua  |      |  | 10969 | GC | USA        |
|       | IS13782 | KD | S Africa   |      |  | 7131  | DC | Uganda     |
|       | IS13893 | KC | S Africa   |      |  | 11026 | D  | Ethiopia   |
|       | IS13919 | KC | S Africa   |      |  | 1004  | D  | India      |
|       | IS13971 | C  | S Africa   |      |  | 20679 | GC | USA        |
|       | IS14290 | KD | Botswana   |      |  | 25836 | D  | Mali       |
|       | IS19389 | C  | Bangladesh |      |  | 12706 | CB | USA        |
|       | IS19445 | K  | Botswana   |      |  | 15744 | DC | Cameroon   |
|       | IS19450 | GK | Botswana   |      |  | 28849 | DC | Yemen      |
|       | IS19676 | K  | Zimbabwe   |      |  | 20195 | B  | Niger      |
|       | IS22239 | K  | Botswana   |      |  | 2872  | CB | Egypt      |
|       | IS22294 | K  | Botswana   |      |  | 22799 | D  | Somalia    |
|       | IS24453 | CB | S Africa   |      |  | 22720 | D  | Somalia    |
|       | IS24463 | K  | S Africa   |      |  | 20298 | CB | Niger      |
|       | IS24492 | K  | S Africa   |      |  | 12804 | B  | Turkey     |
|       | IS26694 | C  | S Africa   |      |  | 2413  | B  | Iran       |
|       | IS26701 | CB | S Africa   | SG10 |  | 28449 | GC | Yemen      |
|       | IS26737 | K  | S Africa   |      |  | 28451 | GC | Yemen      |

|             |         |    |           |      |  |       |    |          |
|-------------|---------|----|-----------|------|--|-------|----|----------|
|             | IS26749 | K  | S Africa  |      |  | 28614 | DC | Yemen    |
|             | IS27887 | CB | S Africa  |      |  | 28747 | DC | Yemen    |
|             | IS27912 | KC | S Africa  |      |  | 29091 | DC | Yemen    |
|             | IS29187 | GC | Swaziland |      |  | 29100 | DC | Yemen    |
|             | IS29233 | K  | Swaziland |      |  | 28389 | DC | Yemen    |
|             | IS29239 | K  | Swaziland |      |  | 28141 | DC | Yemen    |
|             | IS29241 | KC | Swaziland |      |  | 23891 | D  | Yemen    |
|             | IS29269 | GC | Swaziland |      |  | 31706 | D  | Yemen    |
|             | IS29304 | GK | Swaziland |      |  | 31714 | DC | Yemen    |
|             | IS29314 | DC | Swaziland |      |  | 23992 | C  | Yemen    |
|             | IS29326 | CB | Swaziland |      |  | 32245 | DC | Yemen    |
|             | IS29335 | C  | Swaziland |      |  | 27034 | D  | Sudan    |
|             | IS29358 | K  | Lesotho   |      |  | 28313 | DC | Yemen    |
|             | IS29392 | K  | Lesotho   |      |  | 27786 | DB | Morocco  |
|             | IS29441 | KC | Lesotho   |      |  | 31681 | B  | Algeria  |
|             | IS29468 | GC | Lesotho   |      |  | 21863 | B  | Syrian   |
|             | IS29519 | KC | Lesotho   | SG11 |  | 1041  | D  | India    |
|             | IS29565 | GC | Lesotho   |      |  | 4515  | D  | India    |
|             | IS29568 | KC | Lesotho   |      |  | 4581  | D  | India    |
|             | IS29582 | K  | Lesotho   |      |  | 4698  | D  | India    |
|             | IS29606 | K  | S Africa  |      |  | 6351  | D  | India    |
|             | IS29627 | DC | S Africa  |      |  | 6354  | D  | India    |
|             | IS29689 | K  | Zimbabwe  |      |  | 6421  | D  | India    |
|             | IS30092 | DC | Zimbabwe  |      |  | 5094  | D  | India    |
|             | IS30231 | K  | Zimbabwe  |      |  | 32787 | D  | Somalia  |
|             | IS995   | CB | USA       |      |  | 4631  | D  | India    |
| Unclustered | IS1233  | B  | China     |      |  | 18039 | DB | India    |
|             | IS2382  | C  | S Africa  |      |  | 12937 | K  | Ethiopia |
|             | IS2413  | B  | Iran      |      |  | 17980 | D  | India    |
|             | IS3158  | K  | S Africa  |      |  | 4613  | D  | India    |
|             | IS8777  | CB | Uganda    |      |  | 5386  | D  | India    |
|             | IS12447 | DC | Sudan     |      |  | 4372  | GD | India    |
|             | IS12697 | B  | Australia |      |  | 5667  | D  | India    |
|             | IS14090 | C  | Argentina |      |  | 19859 | D  | India    |
|             | IS20697 | C  | USA       |      |  | 4360  | D  | India    |
|             | IS20816 | B  | USA       |      |  | 4060  | DB | India    |
|             | IS24503 | B  | S Africa  |      |  | 5919  | D  | India    |
|             | IS24953 | GC | Zambia    |      |  | 3971  | D  | India    |
|             | IS29714 | KD | Zimbabwe  |      |  | 8348  | D  | Pakistan |
|             | IS30572 | GC | Cameroon  |      |  | 12883 | D  | India    |

Notes: B-bicolor; C-caudatum; D-durra; G-guinea, K-kafir, and KD, KC, CB, etc. are hybrid races.
